# Supplementary material for: Effect of Short Message Service Reminders on Clinic Attendance Among Outpatients With Psychosis at a Psychiatric Hospital in Nigeria
Source: Atypon-hosted journal article supplement (doi:10.1176/appi.ps.201500514), 2016-09-01

**Figure 1: Flow diagram showing the progress through the phases of the randomized controlled trial**

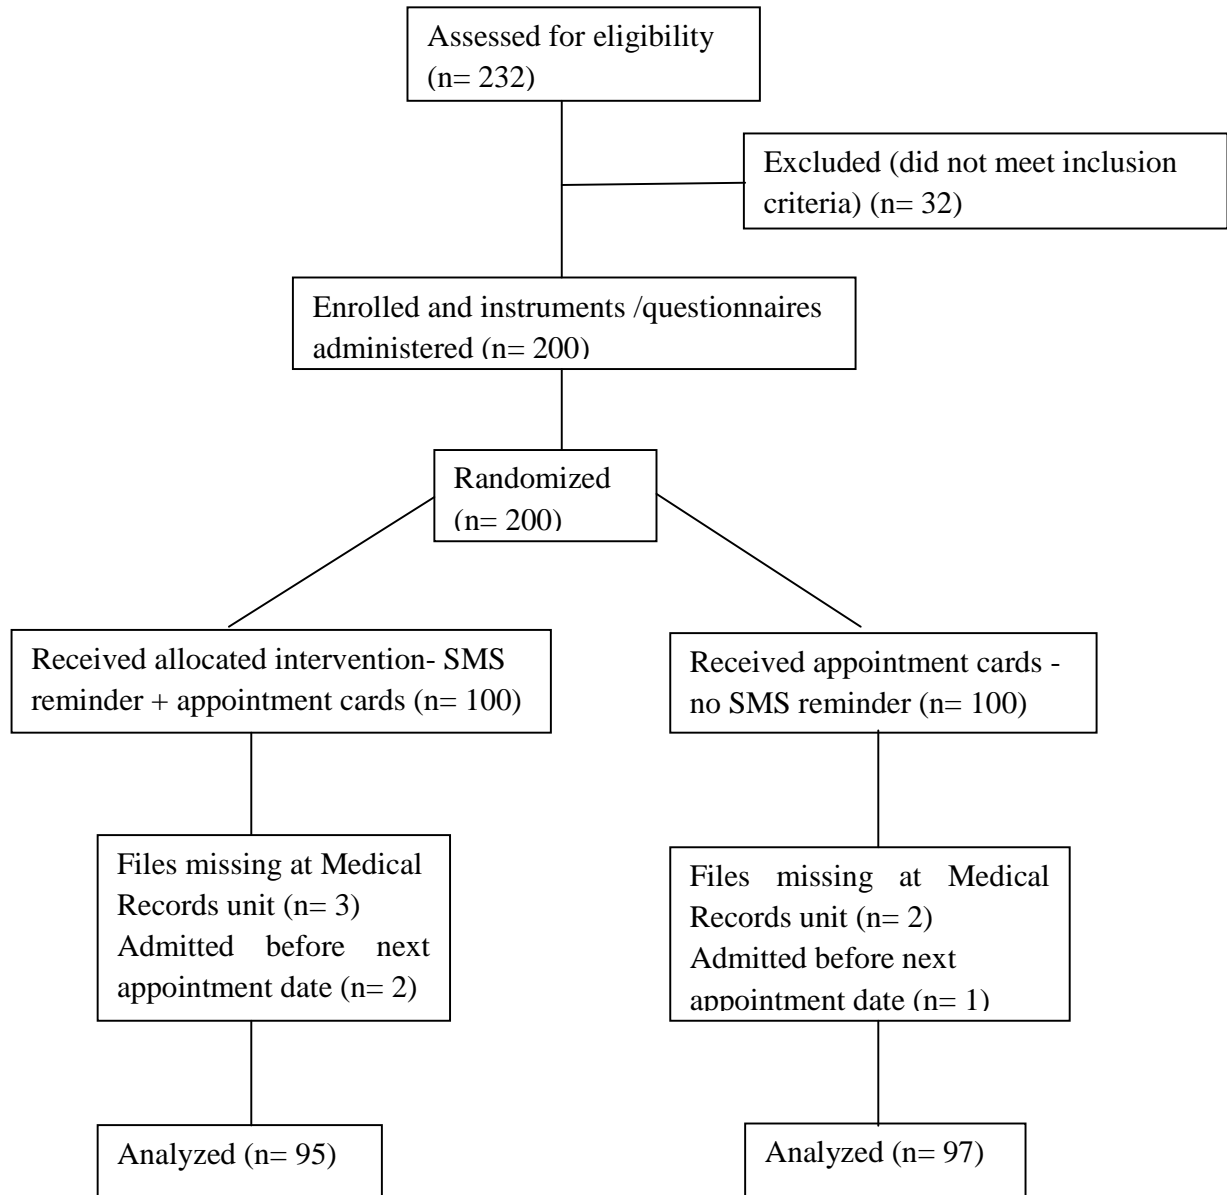

Supplement: appi.ps.201500514.ds001.pdf [file appi.ps.201500514.ds001.pdf]
